# Supplementary material
Source: PubMed Central journal article supplement (PMC10315440)
Supplement: JI_2300207_Supplemental_1.pdf [file JI_2300207_Supplemental_1.pdf]

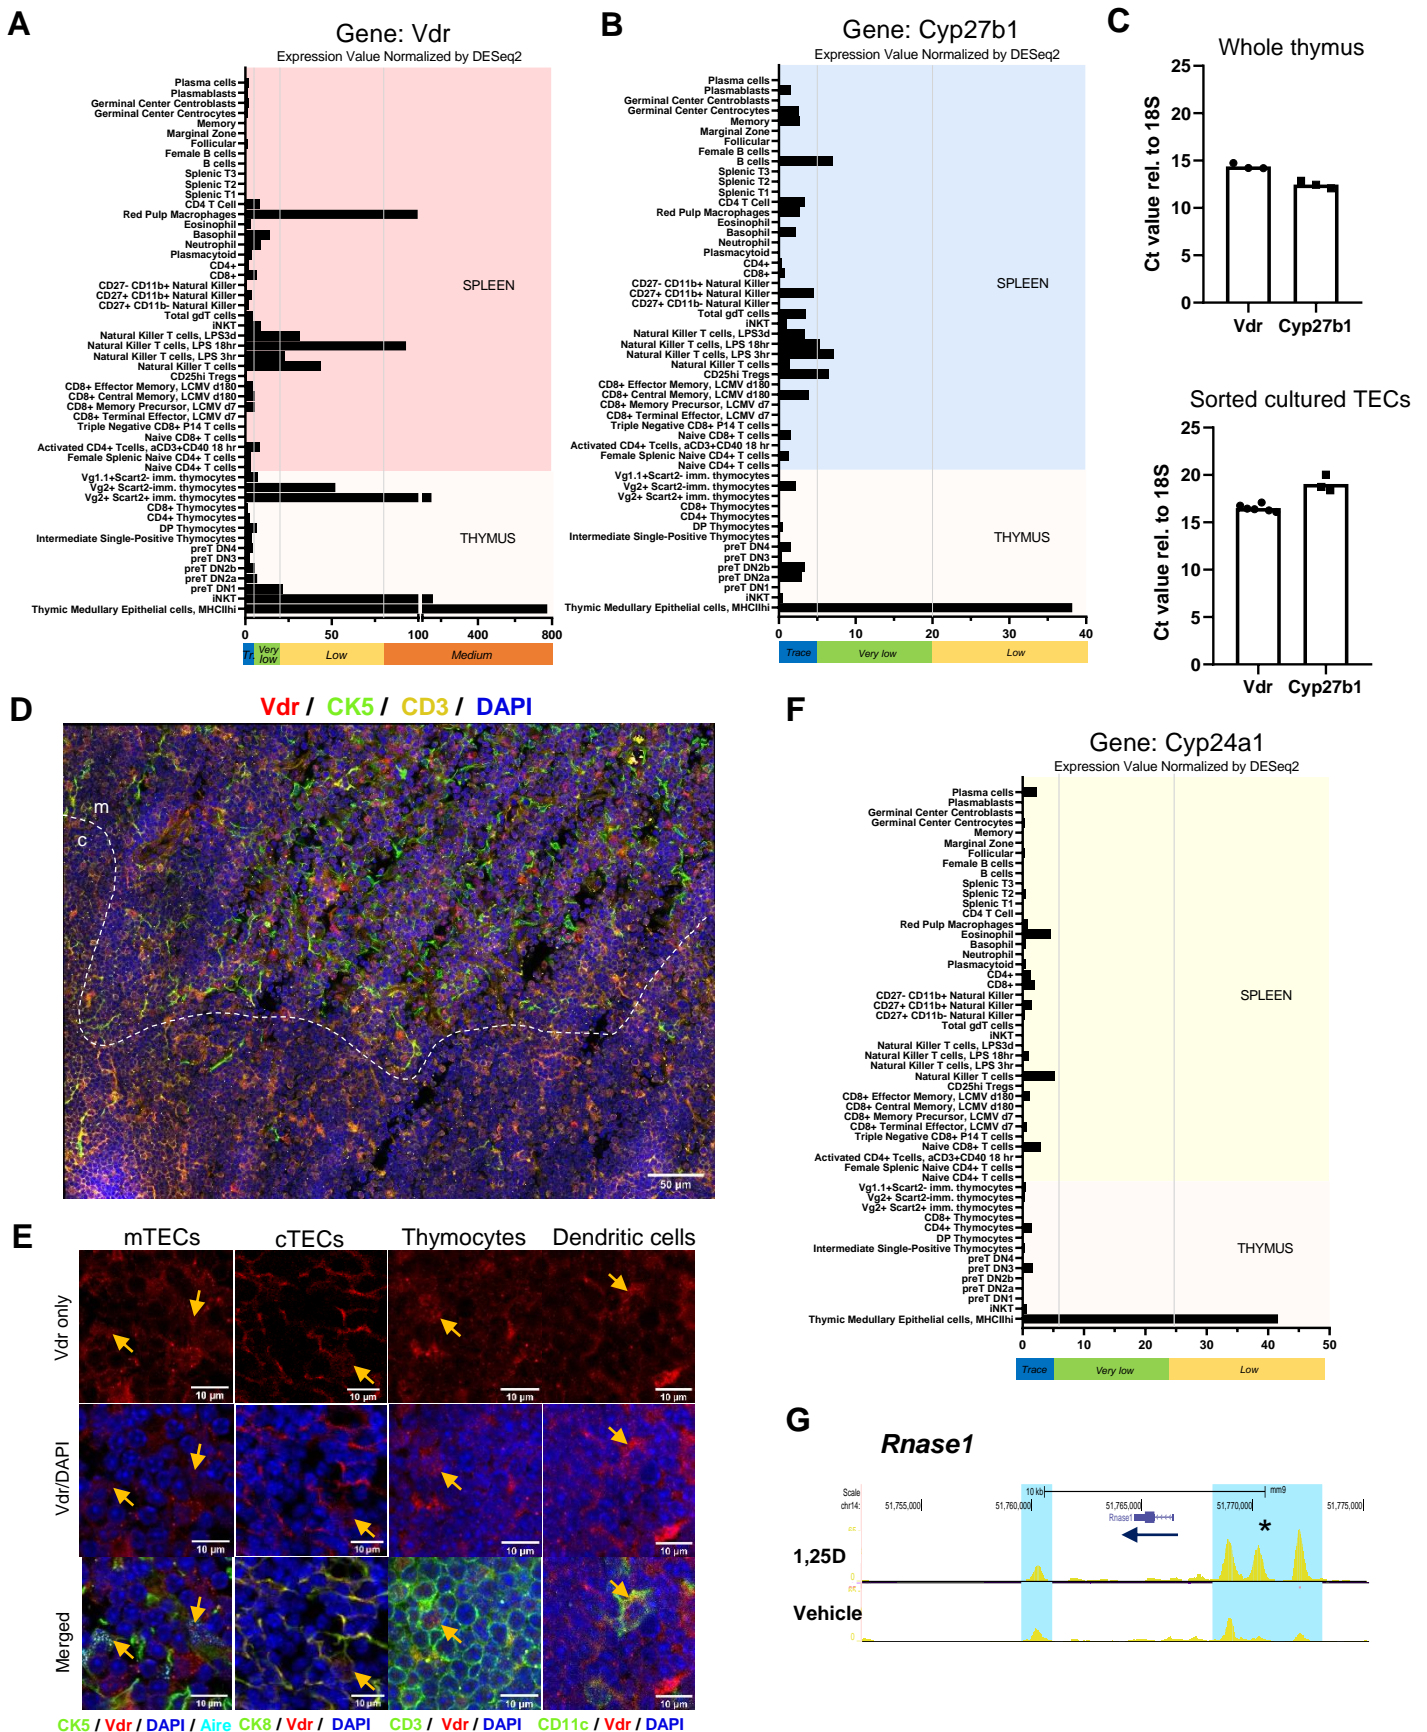

**Supplemental Fig 1 : Active 1,25D signaling in the thymus.** **A.** RNA sequencing data showing *Vdr* mRNA expression in different mouse thymic and splenic cell types [13]. **B.** RNA sequencing data showing *Cyp27b1* mRNA expression in different mouse thymic and splenic cell types [13]. **C.** Detection of *Vdr* and *Cyp27b1* mRNA in mouse thymi (top) or sorted TECs cultured for 6h (bottom), gene expression normalized to 18S and shown as  $\Delta$ Ct values. **D.** Immunohistochemical staining of mouse thymus showing cortical (c) and medullary (m) *Vdr* staining in thymocytes (CD3+) and mTECs (CK5+). **E.** IF microscopy showing *Vdr* staining in Aire+ mTECs, cTECs, thymocytes, and dendritic cells. **F.** RNA sequencing data showing *Cyp24a1* mRNA expression in different mouse thymic and splenic cell types [13]. **G.** UCSC browser image showing mouse intestine VDR ChIP-seq tracks (GEO accession: GSE69179) at the *Rnase1* locus. The areas surrounding the VDR binding sites up- and downstream (regions highlighted in blue) of the genes are shown. The binding site chosen for ChIP analysis is indicated with the asterisk. RNA sequencing data shown in Figs A,B and F was derived from data assembled by the ImmGen consortium [13]. Data are individual mice ( $N \geq 3$ ,  $\geq 1$  experiment).

**A****Nuclear receptor mRNA expression in sorted mTEC<sup>hi</sup> cells**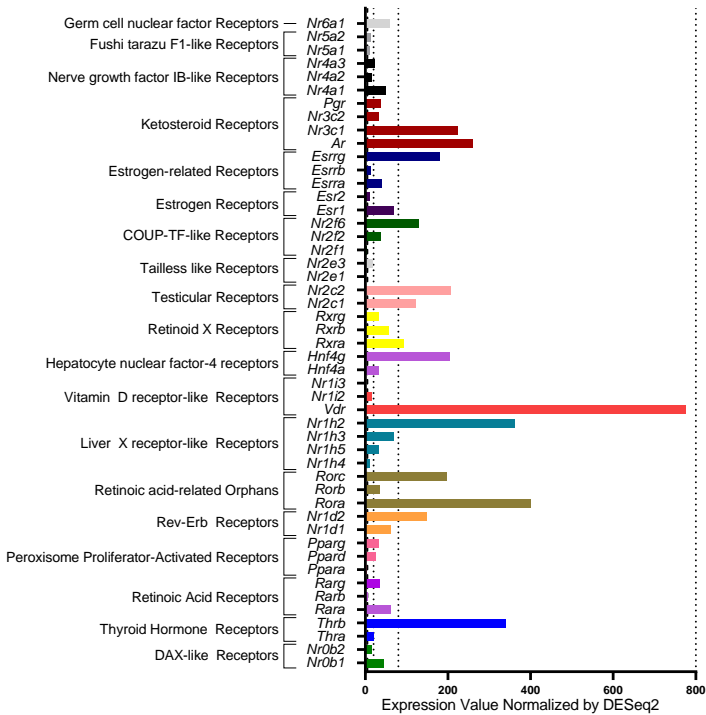**B**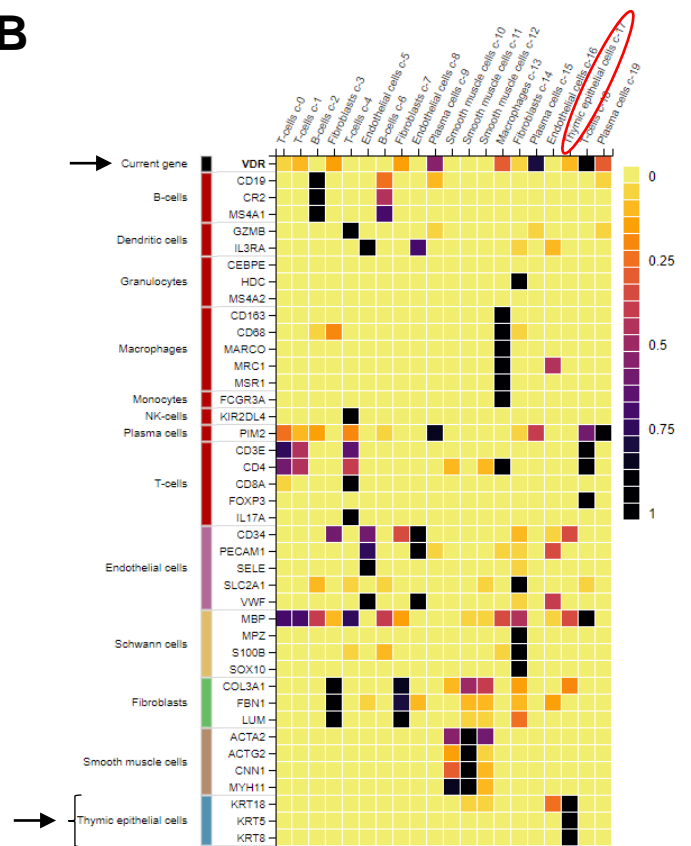**C**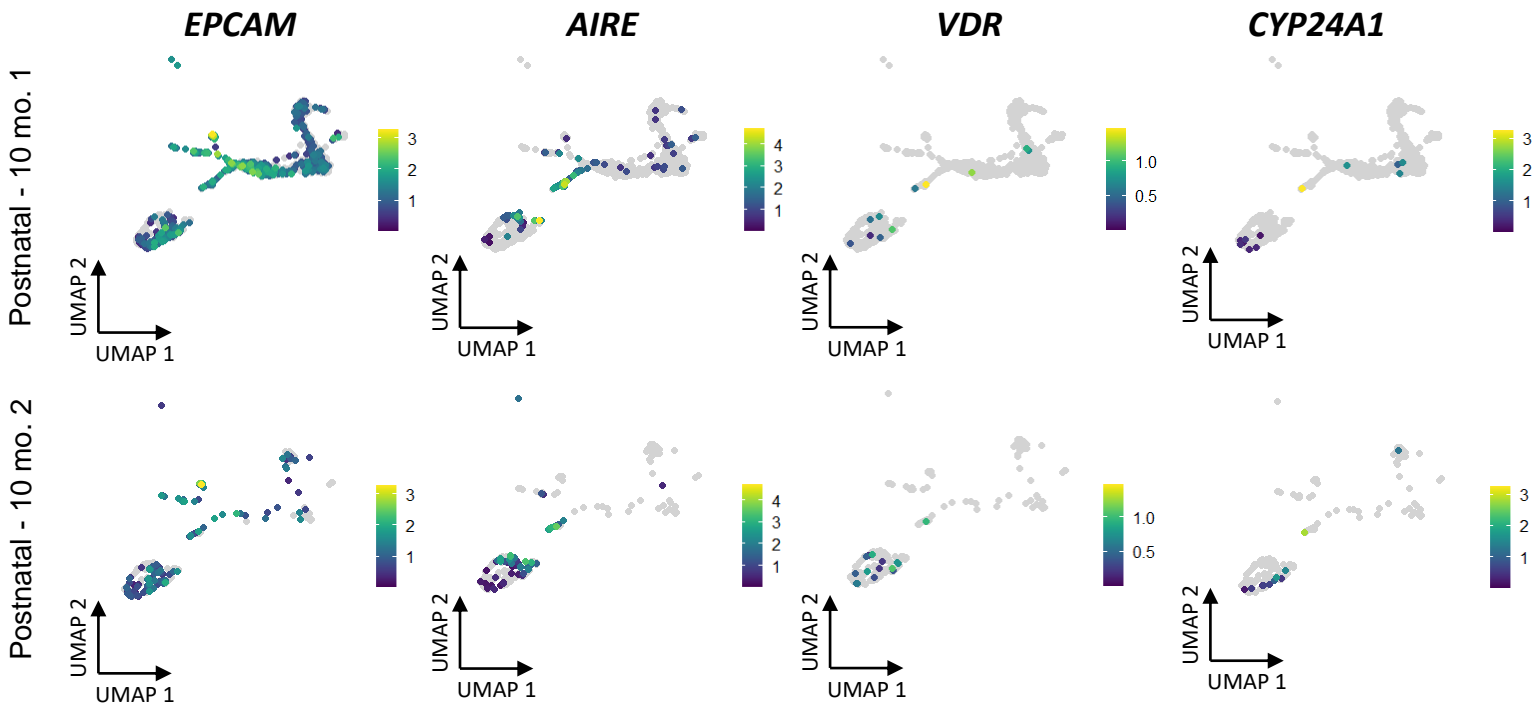**Supplemental Figure 2****Nuclear receptor mRNA expression in sorted mTEC<sup>hi</sup> cells.**

**A.** RNA sequencing data showing mRNA expression of various nuclear receptors in sorted mouse MHC-II<sup>hi</sup> mTECs (This data was derived from data assembled by the ImmGen consortium) [13]. **B.** RNA sequencing data of human thymic cells indicating VDR mRNA expression (arrow) in human TECs. TEC markers KRT5, 8 and 18 are used as positive controls for TECs (double arrow) (Human Protein Atlas proteinatlas.org, image credit: Human Protein Atlas, <https://www.proteinatlas.org/ENSG00000111424-VDR/single+cell+type/thymus>, Tabula Sapiens, C., R.C. Jones, et al. 2022. The Tabula Sapiens: A multiple-organ, single-cell transcriptomic atlas of humans. Science. 376(6594): p. eabl4896). **C.** scRNAseq analysis of TEC samples from duplicate 10-month-old human post-natal thymi (GSM4466784/5) [14].

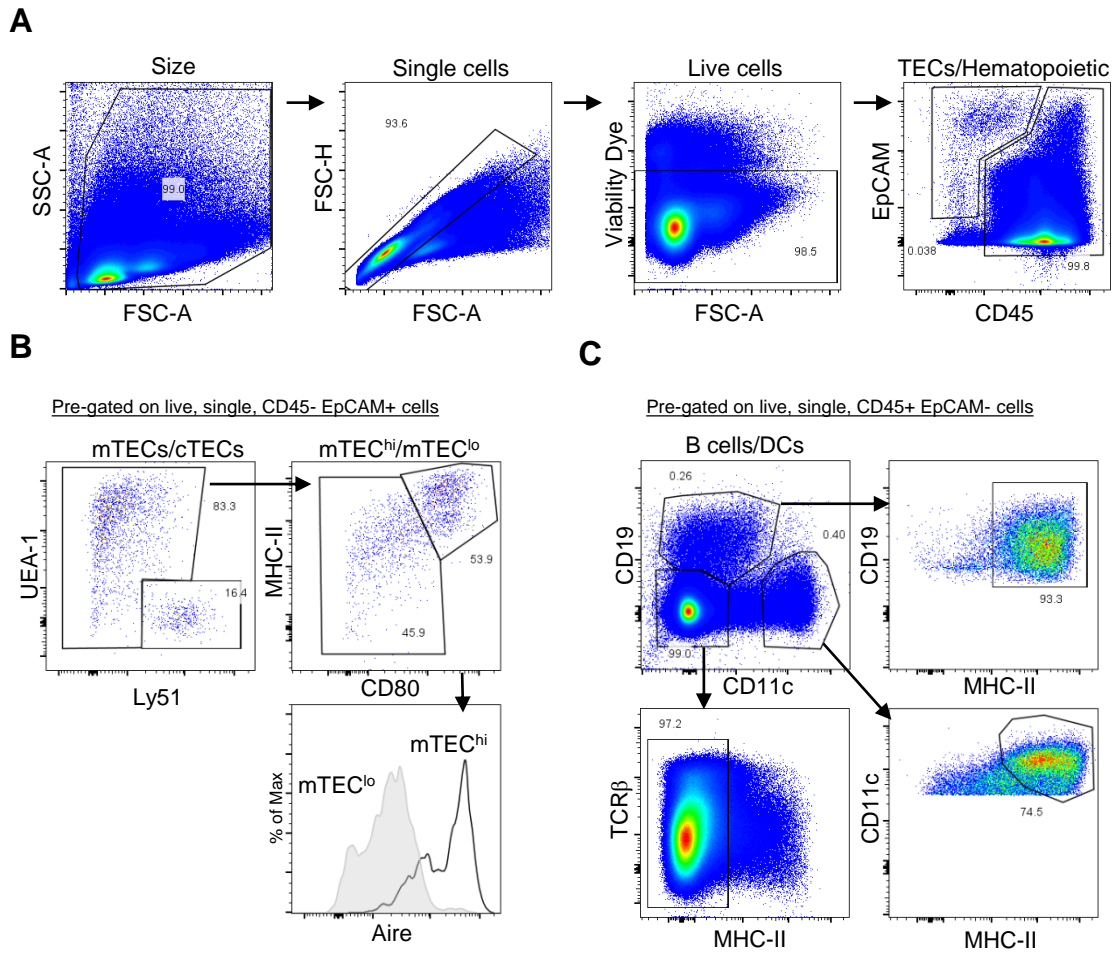

### Supplemental Figure 3

#### Flow cytometry gating strategy for TEC subtypes and various hematopoietic cells

**A-C.** Representative flow cytometry gating strategy including pre-gating on live, single, and stromal or hematopoietic cells (A); stromal cells (B) including mTEC<sup>hi</sup> cells (UEA-1<sup>+</sup>, Ly51<sup>-</sup>, MHC-II<sup>hi</sup>, CD80<sup>+</sup>), mTEC<sup>lo</sup> cells (UEA-1<sup>+</sup>, Ly51<sup>-</sup>, MHC-II<sup>lo</sup>, CD80<sup>-</sup>), cTECs (Ly51<sup>+</sup>, UEA-1<sup>-</sup>); hematopoietic cells (C) including B cells (CD19<sup>+</sup>, MHC-II<sup>+</sup>, CD11c<sup>-</sup>), DCs (CD11c<sup>+</sup>, MHC-II<sup>+</sup>, CD19<sup>-</sup>), and thymocytes (TCRβ<sup>+</sup>, MHC-II<sup>+</sup>, CD19<sup>-</sup>, CD11c<sup>-</sup>).

|                      | Target                         | Conjugate     | Host             | Clone               | Company        | Application | Reference  |
|----------------------|--------------------------------|---------------|------------------|---------------------|----------------|-------------|------------|
| Primary antibodies   | CD11c                          | Unconjugated  | Armenian Hamster | N418                | ThermoFisher   | IF          | 14-0114-81 |
|                      | Cyp27b1                        | Unconjugated  | Rabbit           | Polyclonal          | ThermoFisher   | IF/FC       | PA5-79128  |
|                      | Cytokeratin 5                  | Unconjugated  | Rabbit           | Poly19055           | Biologend      | IF          | 905503     |
|                      | TROMA-1 (Cytokeratin 8)        | Unconjugated  | Rat              | N/A                 | DSHB           | IF          | DSHB       |
|                      | Mouse/Human Vdr                | Unconjugated  | mouse            | D-6                 | Santa Cruz     | WB/ChIP     | sc-13133   |
|                      | Mouse/Human Aire               | Unconjugated  | Rat              | 5H12                | ThermoFisher   | ChIP/CoIP   | 14-5934-82 |
|                      | CD16/32 (Fc block)             | Unconjugated  | Rat              | S17011E             | Biologend      | FC          | 156603     |
|                      | EpCAM                          | PeCy7         |                  | G8.8                | ThermoFisher   | FC          | 25-5791-80 |
|                      | CD45                           | eFluor 450    |                  | 30-F11              | ThermoFisher   | FC          | 48-0451-82 |
|                      | Aire                           | eFluor660     |                  | 5H12                | ThermoFisher   | IF/FC       | 50-5934-80 |
|                      | MHC Class II                   | APC-eFluor780 |                  | M5/114.15.2         | ThermoFisher   | FC          | 47-5321-80 |
|                      | CD19                           | AF700         |                  | 1D3                 | ThermoFisher   | FC          | 56-0193-82 |
|                      | CD3                            | eFluor660     |                  | 17A2                | ThermoFisher   | IF/FC       | 50-0032-80 |
|                      | Ly51                           | eFluor 710    |                  | 6C3                 | ThermoFisher   | FC          | 46-5891-80 |
|                      | NK1.1                          | PE            |                  | PK136               | Biologend      | FC          | 108707     |
|                      | CD80                           | BV650         |                  | 16-10A1             | Biologend      | FC          | 104732     |
|                      | CD11c                          | BV785         |                  | N418                | Biologend      | FC          | 117335     |
| TCR $\beta$          | BV711                          |               | H57-597          | Biologend           | FC             | 109243      |            |
| UEA-1                | Dylight 594                    |               | N/A              | Vector laboratories | FC             | DL-1067     |            |
| Secondary antibodies | horse anti mouse IgG           | HRP           |                  | N/A                 | Cell Signaling | WB          | #7076      |
|                      | goat anti armenian hamster IgG | AF594         |                  | N/A                 | Biologend      | IF          | 405512     |
|                      | goat anti rabbit IgG           | AF488         |                  | N/A                 | ThermoFisher   | IF/FC       | A11034     |
|                      | goat anti rat IgG              | AF546         |                  | N/A                 | ThermoFisher   | IF          | A11081     |
| Other reagents       | DAPI                           | N/A           |                  | N/A                 | ThermoFisher   | IF          | D1306      |

Supplemental Table 1 – List of antibodies and reagents used.
